## CORRECTION

# Correction: Hormesis-like effect of mild larval crowding on thermotolerance in *Drosophila* flies (doi: 10.1242/jeb.169342)

**Youn Henry, David Renault and Hervé Colinet**

There was an error published in *J. Exp. Biol.* (2018) **221**, jeb169342 (doi: 10.1242/jeb.169342).

The first author's name was incorrectly displayed. The correct version is shown above. This has been corrected in the online full-text and PDF versions.

We apologise to the authors and readers for any inconvenience this may have caused.
